# Supplementary material for: Controlled synthesis of CuS caved superstructures and their application to the catalysis of organic dye degradation in the absence of light
Source: Royal Society of Chemistry journal article supplement (doi:10.1039/c4ce02120g), 2014-12-15
Supplement: c4ce02120g1.pdf [file c4ce02120g1.pdf]

## Supporting information

### Controlled synthesis of CuS caved superstructures and their application to the catalysis of organic dye degradation in the absence of light

Qun Wei Shu,<sup>a,c</sup> Jing Lan,<sup>b</sup> Ming Xuan Gao,<sup>a</sup> Jian Wang,<sup>b</sup> Cheng Zhi Huang<sup>\*,a,b</sup>

<sup>a</sup> Key Laboratory of Luminescent and Real-Time Analytical Chemistry (Southwest University, Ministry of Education, College of Chemistry and Chemical Engineering, Southwest University, Chongqing 400715. <sup>b</sup> College of Pharmaceutical Sciences, Southwest University, Chongqing 400715, PR China. E-mail: chengzhi@swu.edu.cn; Fax/Tel: (+86)-23-68254659. <sup>c</sup> College of Chemical Engineering, Guizhou University of Engineering Science, Guizhou 551700, PR China.

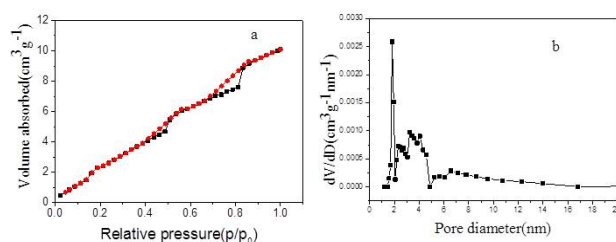

Fig. S1 Nitrogen adsorption-desorption isotherms (a) and pore size distribution (b) of the CuS caved superstructures

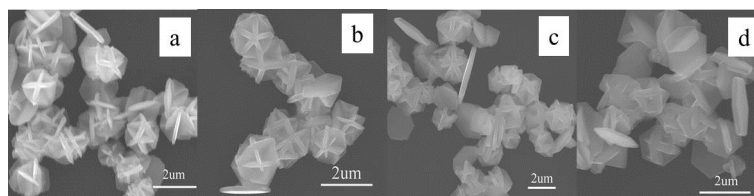

Fig.S2 The SEM images of CuS materials. The reaction temperature of CuS caved superstructures was (a) 110 °C, (b) 120 °C, (c) 130 °C and (d) 140 °C, and other reaction conditions were invariant.

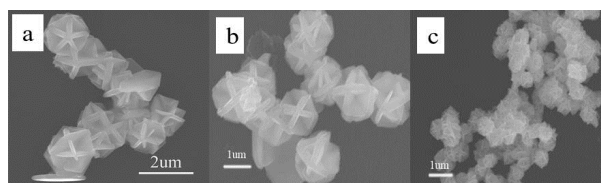

Fig.S3 The SEM images of CuS caved superstructures. The CuSO<sub>4</sub> dissolved temperature of CuS caved superstructures was (a) 150 °C (b) 160 °C and (c) 170 °C in the EG, and other reaction conditions were invariant.

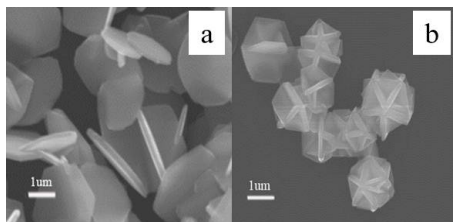

Fig.S4 The SEM images of CuS caved superstructures. (a) and (b) without and with preheating EG, and other reaction conditions were invariant.

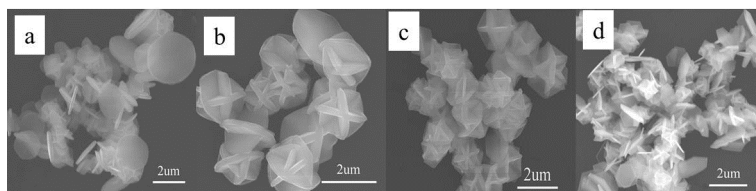

Fig.S5 The SEM images of CuS caved superstructures. The molar ratio of Cu:S was (a) 4:1,(b) 2:1, (c) 1:1 and (d) 0.5:1, and other reaction conditions were invariant.

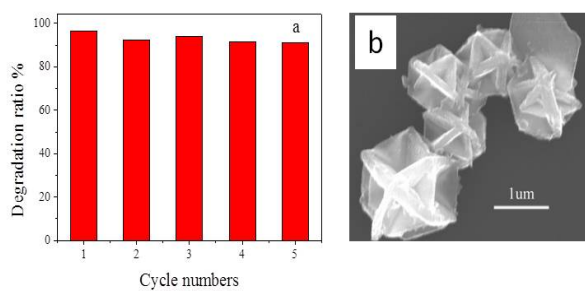

Fig.S6 (a)The cyclic utilization of CuS caved superstructures for the degradation of MB with the addition of  $\text{H}_2\text{O}_2$  for 10 min.(b) The SEM image of the CuS caved superstructures after catalytic reaction for five cycles.
